# Supplementary material
Source: MDPI journal article supplement (https://www.mdpi.com/2673-4591/11/1/8)
Supplement: s1 [file s1]

Archive with 1 entries (1 files):
- 10.3390ASEC2021-11176-supplementary.pdf
